# Supplementary material
Source: PubMed Central journal article supplement (PMC6407643)
Supplement: NIHMS1522064-supplement-1.pdf [file NIHMS1522064-supplement-1.pdf]

# **A Quarter Century of APOE and Alzheimer's Disease: Progress to Date and the Path Forward**

## **Supplementary text**

**Authors:** Michaël E. Belloy, Valerio Napolioni, Michael D. Greicius

<sup>1</sup>Department of Neurology and Neurological Sciences, FIND Lab, Stanford University, Stanford, CA, 94304, USA

\*Correspondence: [greicius@stanford.edu](mailto:greicius@stanford.edu)

The geographical map of *APOE4* frequency was generated using the *rworldmap* R package. Country-estimates were obtained by averaging *APOE4* allele frequency across the different studies carried out in a defined country. *APOE4* allele frequencies were available for a total of 118 countries. *APOE4* allele frequency for 73 countries was determined using the published data from (Singh et al., 2006). *APOE4* allele frequency estimates for an extra 45 countries were added based on other literature (see table below). For the newly added countries, when considering case-control studies, only the control group (when reported as “healthy”) was considered.

## References

Singh, P.P., Singh, M., and Mastana, S.S. (2006). APOE distribution in world populations with new data from India and the UK. *Ann. Hum. Biol.* 33, 279–308.

| COUNTRY_ISO_CODE_3 | Pubmed_ID_or doi when not indexed in Pubmed                                                               |
|--------------------|-----------------------------------------------------------------------------------------------------------|
| ARG                | 8890795                                                                                                   |
| AUS                | 23660682                                                                                                  |
| BGD                | 26432245                                                                                                  |
| BGR                | <a href="https://doi.org/10.1080/13102818.2018.1529542">https://doi.org/10.1080/13102818.2018.1529542</a> |
| BIH                | 28705029                                                                                                  |
| BLR                | 22039151                                                                                                  |
| BOL                | 21845926; 22681517                                                                                        |
| BRB                | 26432245                                                                                                  |
| BWA                | 24679048                                                                                                  |
| DOM                | 21059989                                                                                                  |
| DZA                | 24160669                                                                                                  |
| EGY                | <a href="https://doi.org/10.1016/j.ejmhg.2015.08.001">https://doi.org/10.1016/j.ejmhg.2015.08.001</a>     |
| EST                | 9727753, 15090431                                                                                         |
| GHA                | 24679048                                                                                                  |
| GMB                | 26432245                                                                                                  |
| GNQ                | 22039151                                                                                                  |
| HRV                | 28705029                                                                                                  |
| IRN                | 22039151                                                                                                  |
| JAM                | 9546341                                                                                                   |
| JOR                | <a href="https://doi.org/10.1016/j.jksus.2018.08.004">https://doi.org/10.1016/j.jksus.2018.08.004</a>     |
| KAZ                | 24772377                                                                                                  |
| KWT                | 16485778                                                                                                  |
| LAO                | 27168072                                                                                                  |
| LBN                | 22039151                                                                                                  |
| LKA                | 26432245                                                                                                  |
| LTU                | 22844488                                                                                                  |
| OMN                | 15785096                                                                                                  |
| PAK                | 26432245                                                                                                  |
| PER                | 26432245                                                                                                  |
| PHL                | 21937998                                                                                                  |

|     |          |
|-----|----------|
| PSE | 21716749 |
| QAT | 24239320 |
| ROU | 17848120 |
| RUS | 22039151 |
| SLE | 26432245 |
| SRB | 28705029 |
| SVK | 28705029 |
| SVN | 28705029 |
| TUN | 24679048 |
| UKR | 22039151 |
| VEN | 15735320 |
| VNM | 26432245 |
| WSM | 22039151 |
| ZMB | 24679048 |
| ZWE | 27917221 |
